# Supplementary material for: In search for the SARS-CoV-2 protection correlate: A head-to-head comparison of two quantitative S1 assays in a group of pre-characterized oligo-/asymptomatic patients
Source: bioRxiv or medRxiv preprint supplement (doi:10.1101/2021.02.19.21252080), 2021-02-23

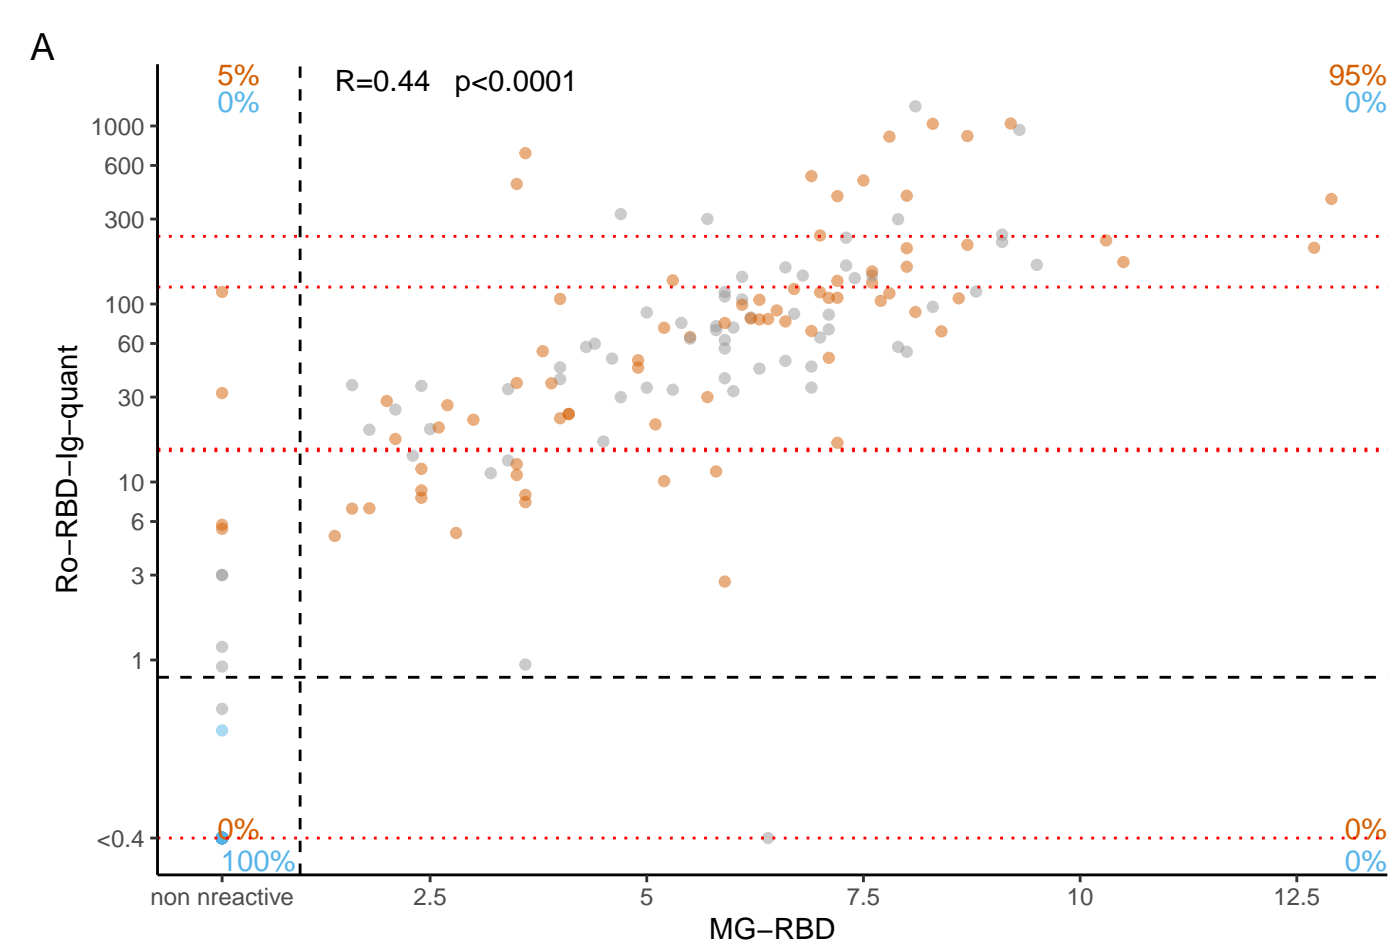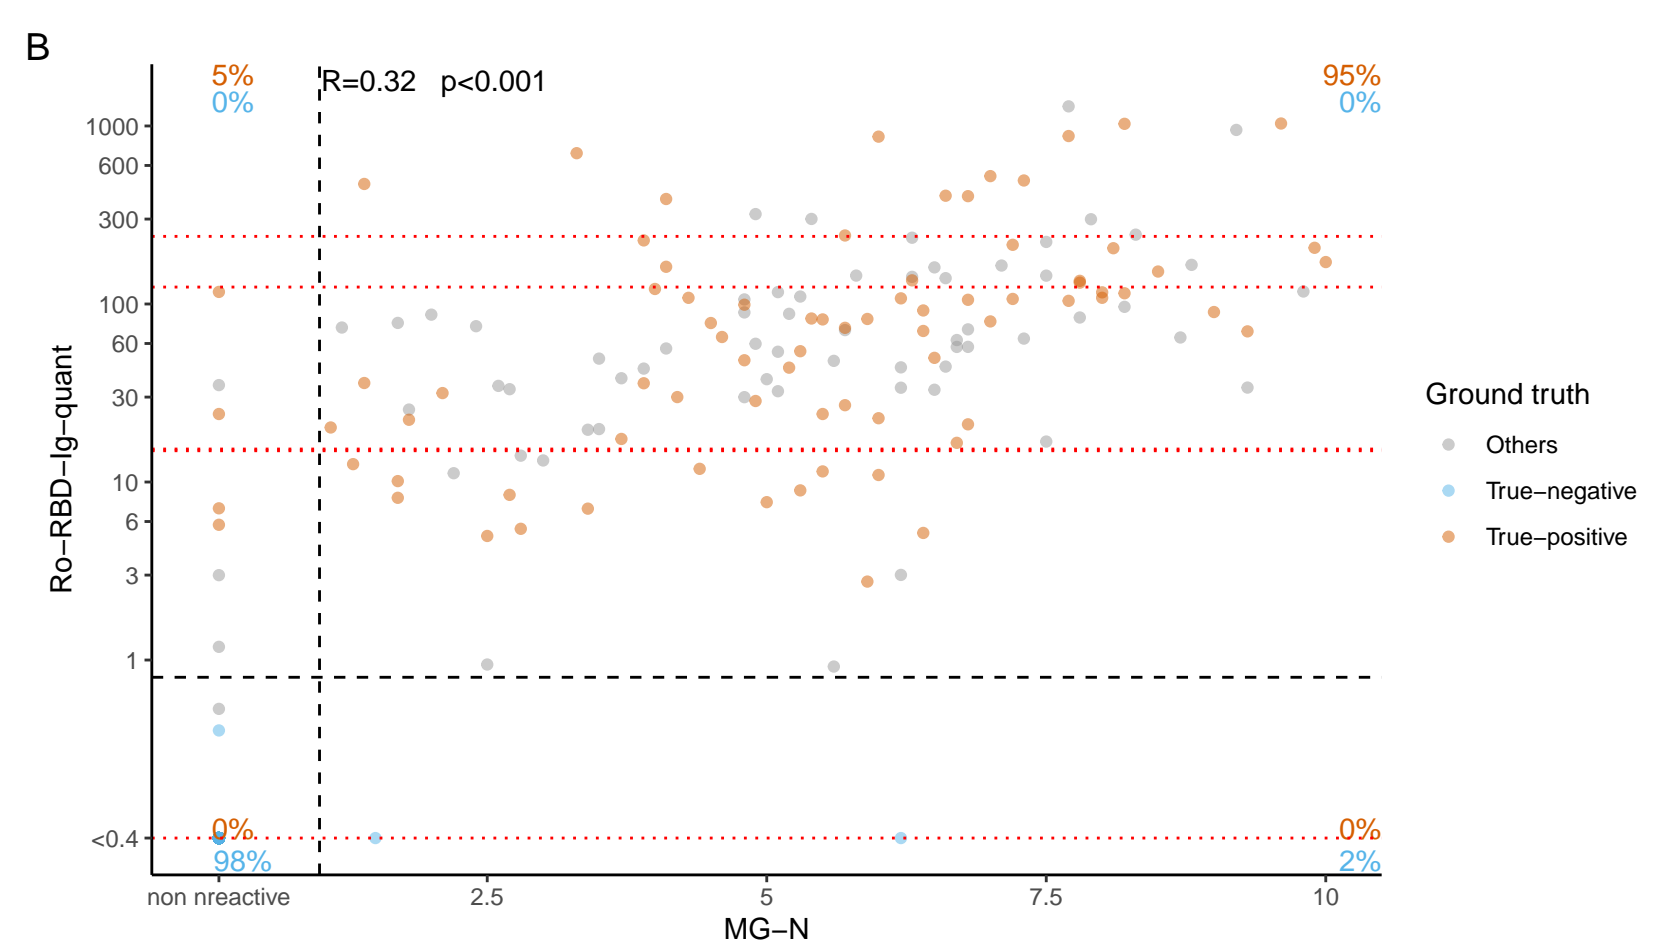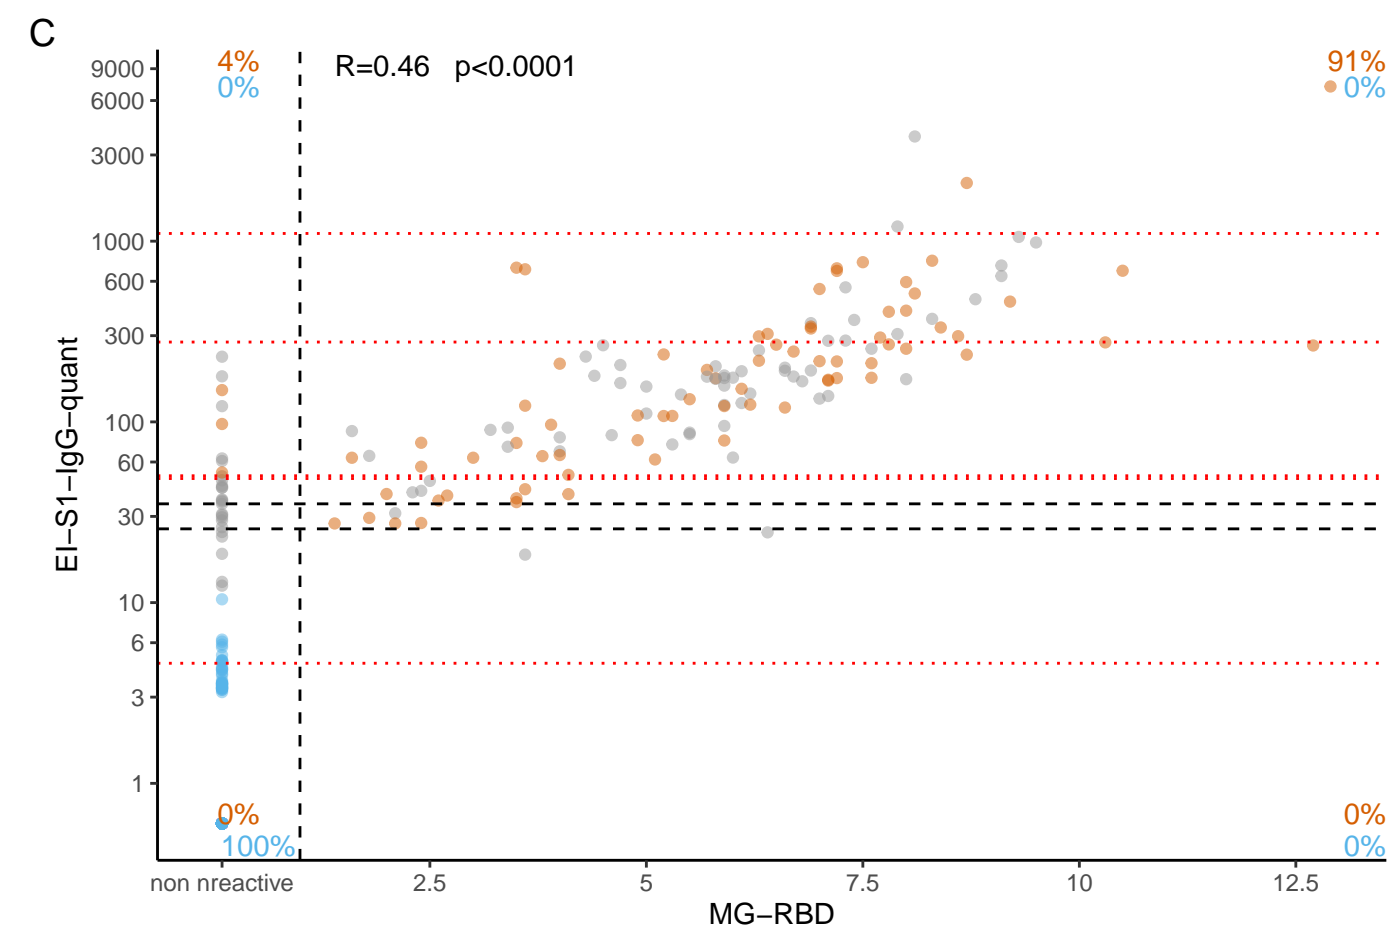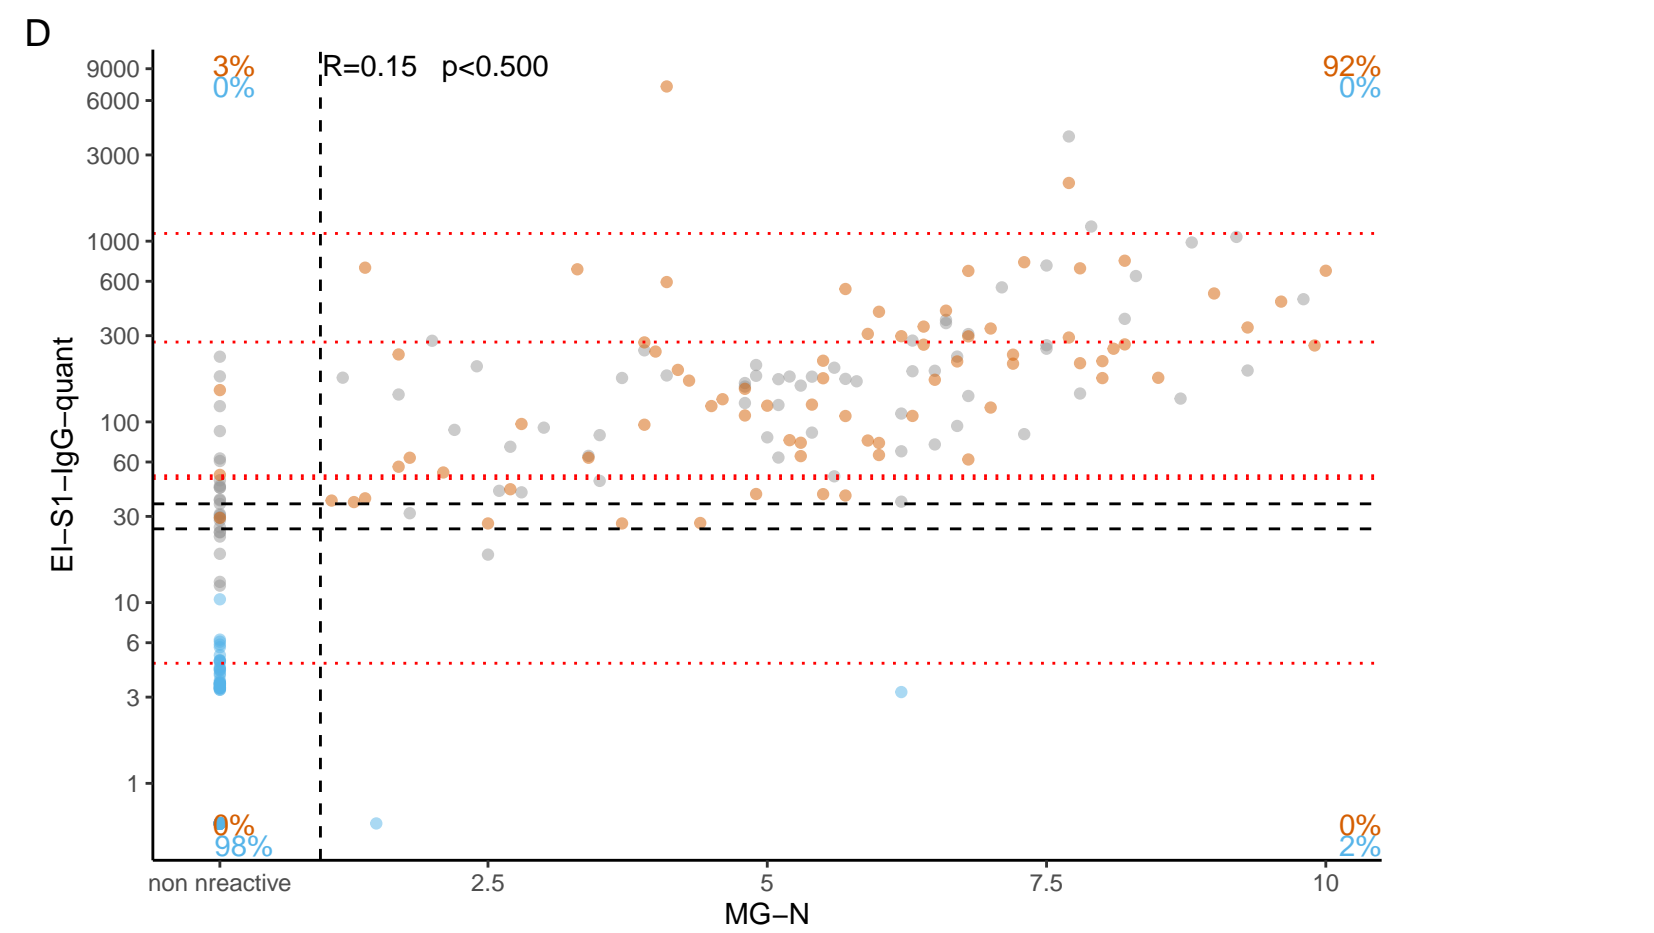

Supplement: Supplementary file [file media-1.pdf]
